# Supplementary material for: Identification and functional analysis of long intergenic noncoding RNA genes in porcine pre-implantation embryonic development
Source: PubMed Central journal article supplement (PMC5138625; doi:10.1038/srep38333), 2016-12-06
Supplement: srep38333-s1.pdf [file srep38333-s1.pdf]

# Identification and functional analysis of long intergenic noncoding RNA genes in porcine pre-implantation embryonic development

Jingyu Li<sup>1</sup>, Zhengling Gao<sup>1</sup>, Xingyu Wang<sup>2</sup>, Hongbo Liu<sup>2</sup>, Yan Zhang<sup>2\*</sup>, Zhonghua Liu<sup>1\*</sup>

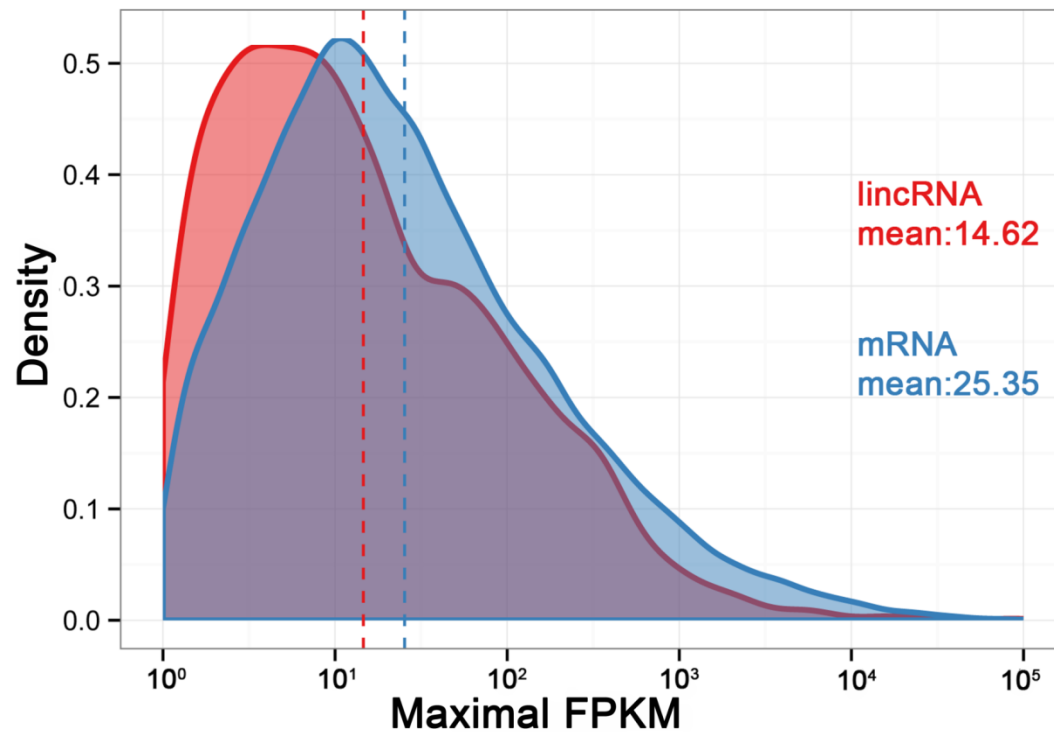

**Supplementary Figure S1. Distribution of maximal expression level of lincRNAs and mRNAs across five RNA-seq datasets.**

### Pig Module–Stage relationships

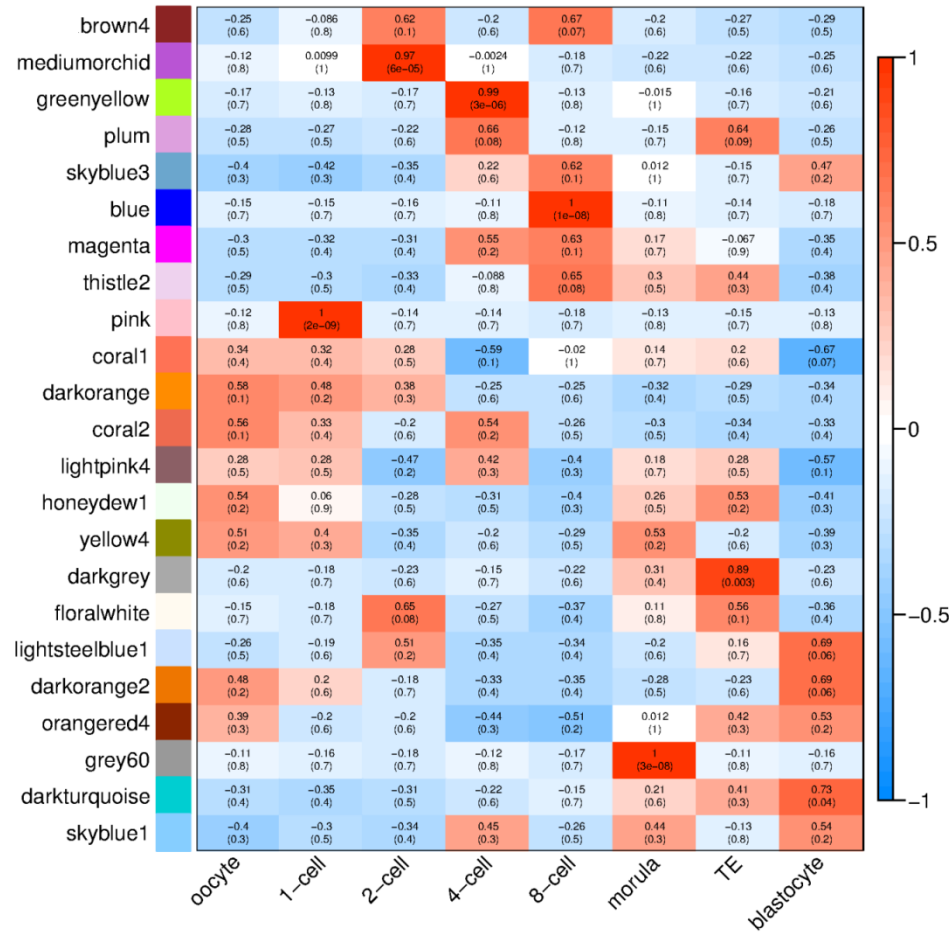

**Supplementary Figure S2. Module development stage correlation.** Each row corresponds to a module eigengene, column to each development stage. Each cell contains the corresponding correlation and *p*-value. The table is color-coded by correlation according to the color legend.

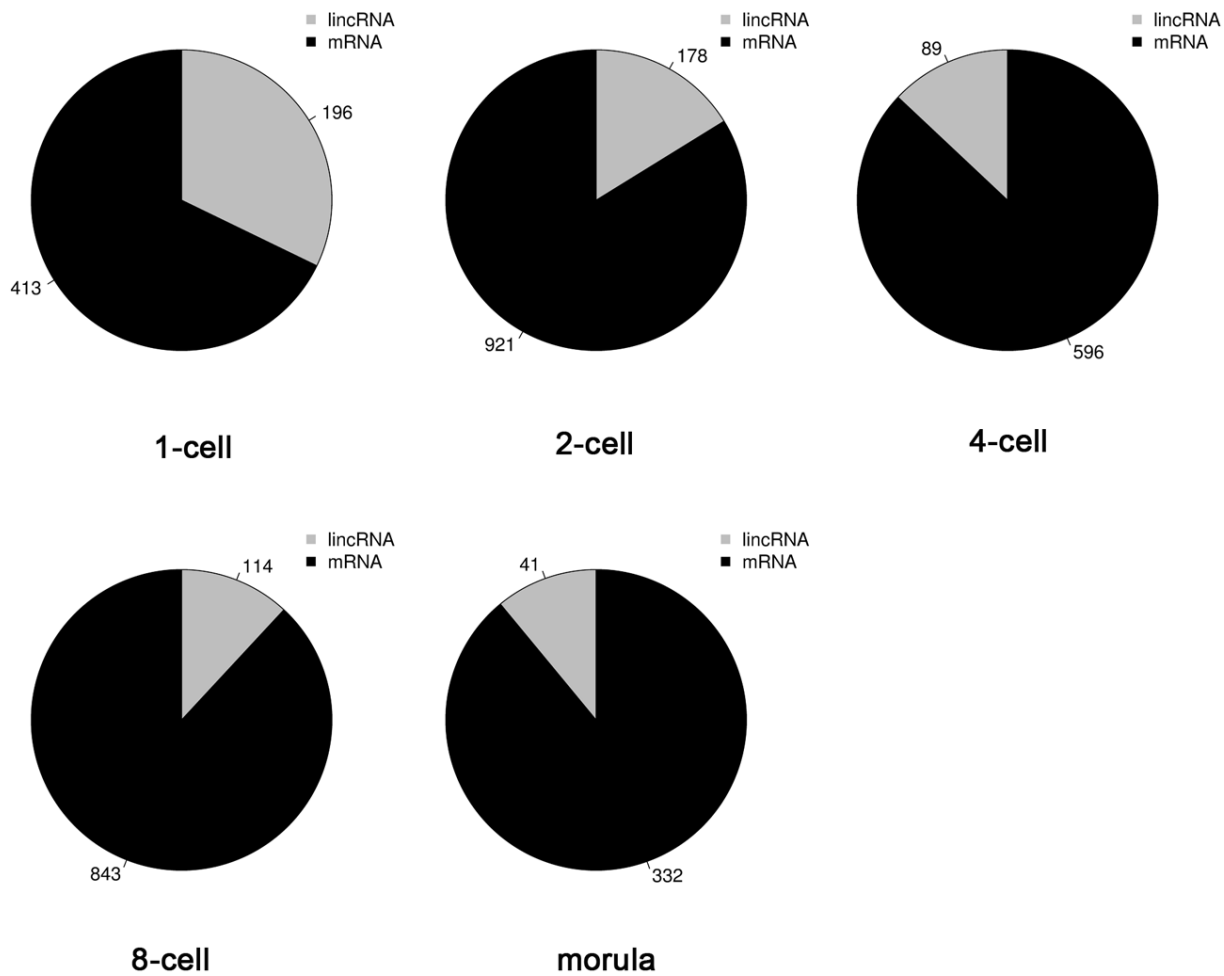

**Supplementary Figure S3. The ratio of mRNAs and lincRNAs in module.**

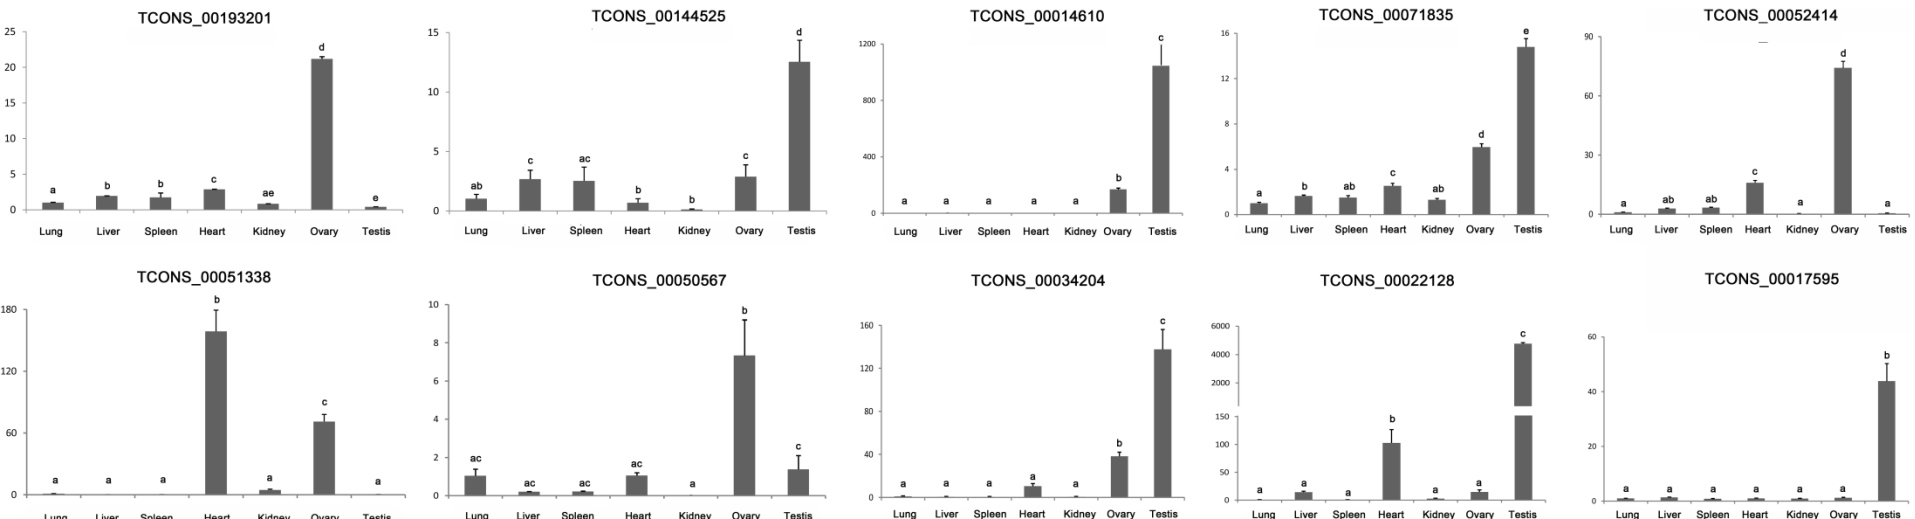

**Supplementary Figure S4. The expression of eight hub lincRNAs from 4-cell stage-specific module in porcine different tissues.** Results are presented as mean values  $\pm$  SEM. Different letters indicate significant differences ( $p < 0.05$ ).

**A**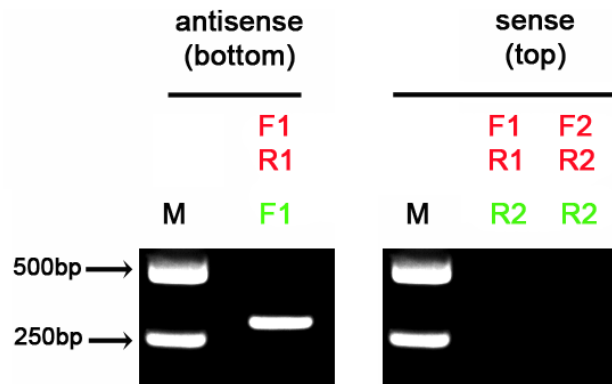**TCONS\_00166370****B**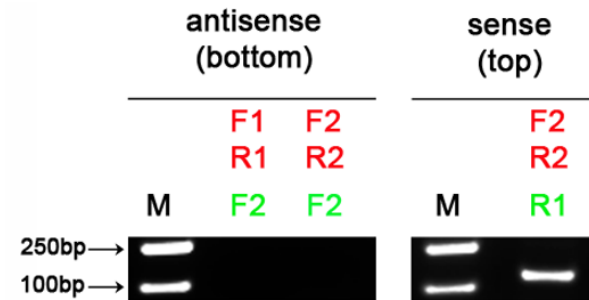**TCONS\_00020255**

**Supplementary Figure S5. SSRT-PCR result of *TCONS\_00166370* and *TCONS\_00020255*.** It shows that *TCONS\_00166370* is transcribed from the bottom strand, and *TCONS\_00020255* are the from the top strand.
